# Supplementary material for: A Complex Regulatory Network Coordinating Cell Cycles During C. elegans Development Is Revealed by a Genome-Wide RNAi Screen
Source: PubMed Central journal article supplement (PMC4025478; doi:10.1534/g3.114.010546), 2014-02-28
Supplement: supp_g3.114.010546_010546SI.pdf [file supp_g3.114.010546_010546SI.pdf]

## **A complex regulatory network coordinating cell cycles during *Caenorhabditis elegans* development is revealed by a genome-wide RNAi screen**

Sarah H. Roy,<sup>\*1</sup> David V. Tobin,<sup>\*1</sup> Nadin Memar,<sup>§</sup> Eleanor Beltz,<sup>\*</sup> Jenna Holmen,<sup>\*</sup> Joseph E. Clayton,<sup>\*</sup> Daniel J. Chiu,<sup>\*</sup> Laura D. Young,<sup>\*</sup> Travis H. Green,<sup>\*</sup> Isabella Lubin,<sup>\*</sup> Yuying Liu,<sup>\*</sup> Barbara Conradt<sup>§</sup> and R. Mako Saito<sup>\*, †, 2</sup>

### Author Affiliations

<sup>\*</sup>Department of Genetics

Geisel School of Medicine at Dartmouth

Hanover, New Hampshire 03755 USA

<sup>§</sup>Center for Integrated Protein Science Munich (CIPSM)

Biocenter, LMU Munich

82152 Planegg-Martinsried, Germany

<sup>†</sup>Norris Cotton Cancer Center

Lebanon, New Hampshire 03755 USA

<sup>1</sup>These authors contributed equally to this work.

<sup>2</sup>Corresponding author: Dept. of Genetics and Norris Cotton Cancer Center, 601 Vail, HB 7400, Geisel School of Medicine at Dartmouth, Hanover, NH 03755. Email: Richard.M.Saito@Dartmouth.edu

**DOI: 10.1534/g3.114.010546**

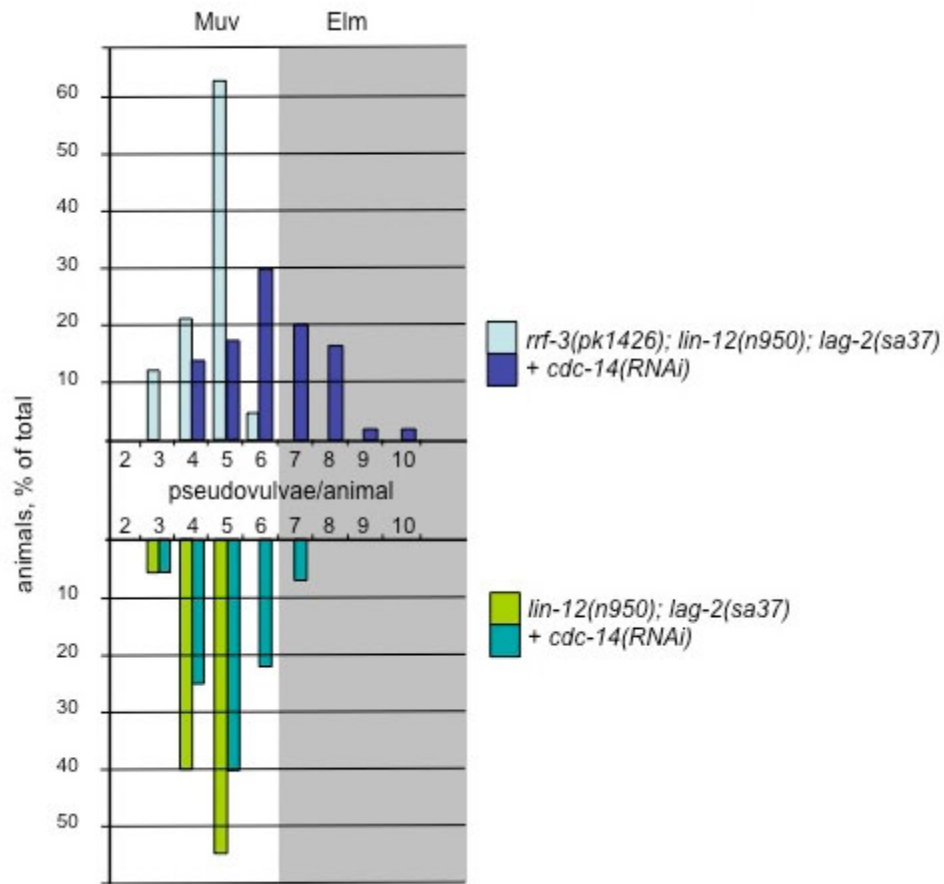

**Figure S1** The VW22 strain incorporates several favorable characteristics. The *rrf-3(pk1426)* mutation enhances the Elm phenotype of *cdc-14(RNAi)*. Comparison of pseudovulva number produced by *lin-12(n950); lag-2(sa37)* double mutant (lower graph) and *rrf-3(pk1426); lin-12(n950); lag-2(sa37)* triple mutant (upper graph) animals. Animals displaying the Elm phenotype are indicated by grey shading.

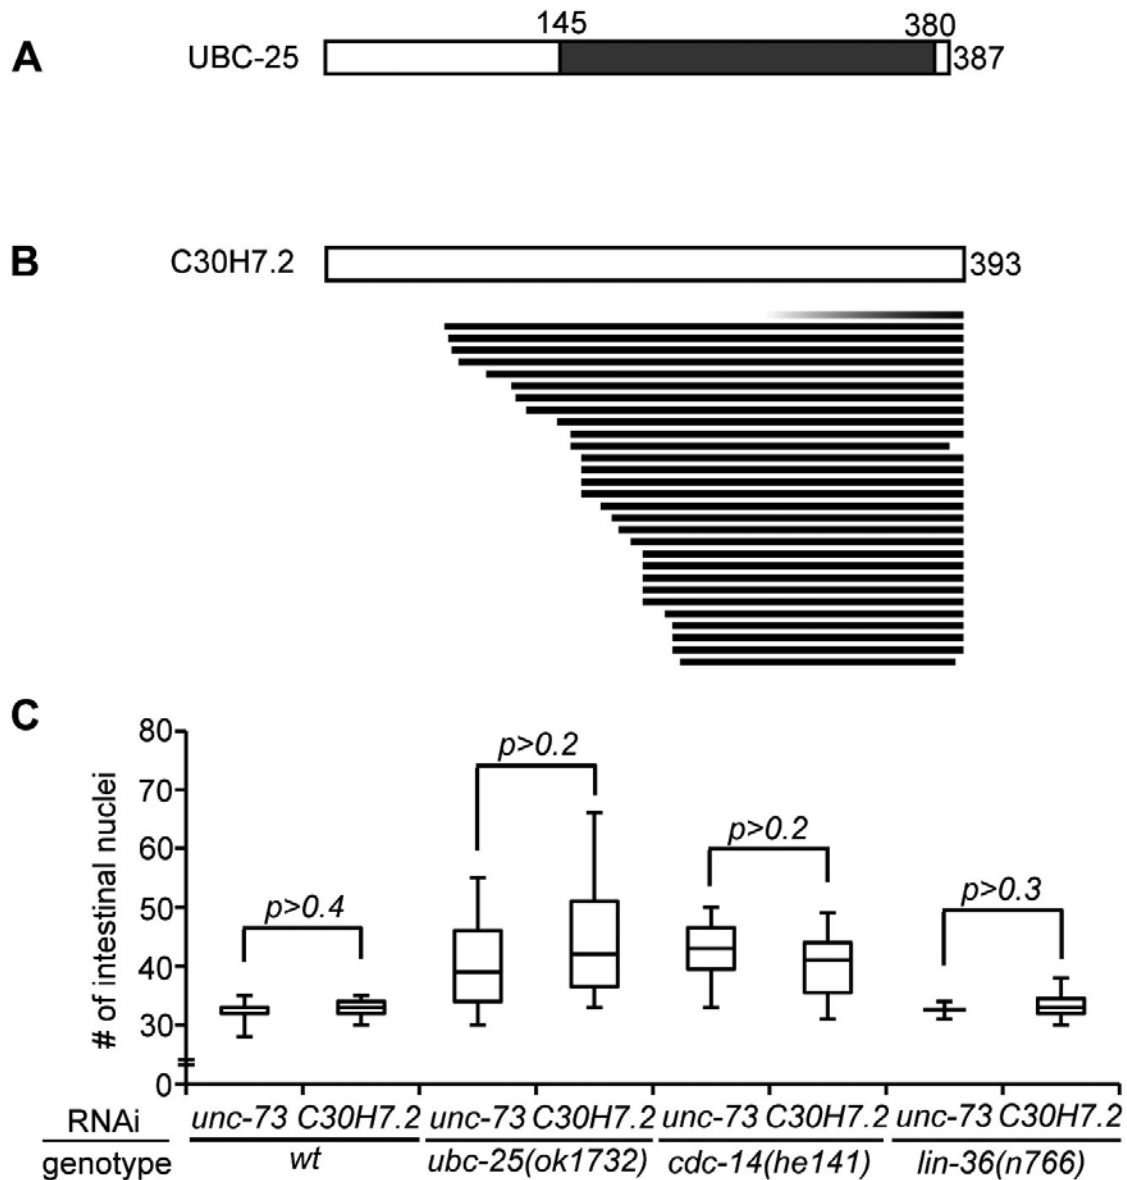

**Figure S2** UBC-25 yeast two-hybrid screen identifies C30H7.2. (A) Diagram of UBC-25 open reading frame used in Y2H screen. Ubiquitin conjugating domain is shaded dark grey. The UBC-25 cDNA was cloned in-frame with the LexA DNA binding domain. Approximately  $7.8 \times 10^7$  potential interactions within a high complexity *C. elegans* cDNA library were screened. (B) Schematic diagram illustrating the open reading frames of the thirty clones (black lines) representing C30H6.2 that were isolated in the UBC-25 Y2H screen. The cDNA inserts were sequenced from both the 5' and 3' directions. The 5' sequence of a single clone was not determined and is shown as a fading black line. (C) RNAi-mediated inhibition of C30H7.2 did not significantly alter the number of intestinal nuclei in *wt*, *unc-25(ok1732)*, *cdc-14(he141)*, or *lin-36(n766)* mutant animals. Intestinal nuclei were examined during the L4 stage.

**Table S1 Genes identified in the Elm phenotype RNAi screen**

Available for download as an Excel file at <http://www.g3journal.org/lookup/suppl/doi:10.1534/g3.114.010546/-/DC1>

**Table S2** *ubc-25(ok1732)* causes temperature-sensitive viability defect

| Temp. | wild type         |              | <i>ubc-25(ok1732)</i> |              |
|-------|-------------------|--------------|-----------------------|--------------|
|       | Brood size        | % Emb        | Brood size            | % Emb        |
| 15°C  | 189.4±19.7 (n=8)  | 0.8 (n=1510) | 181.9±34.5 (n=11)     | 2.6 (n=2001) |
| 20°C  | 273.0±34.6 (n=10) | 2.7 (n=2734) | 236.4±53.8 (n=11)     | 6.7 (n=2600) |
| 25°C  | 190.6±32.5 (n=7)  | 1.6 (n=1576) | 64.9±15.5 (n=9)       | 69.8 (n=584) |

**Table S3** The *ubc-25(ok1732)* mutation does not disturb the cell-cycle quiescence of the M, V, and Z cell lineages

| lineage | age | reporter          | wild type        | <i>ubc-25(ok1732)</i> |
|---------|-----|-------------------|------------------|-----------------------|
| M       | L2  | <i>hlh-8::GFP</i> | 16.5±0.7 (n=24)  | 17.7±0.6 (n=20)       |
| V       | L4  | <i>scm::GFP</i>   | 16.1±0.2 (n=20)* | 16.1±0.6 (n=20)*      |
| Z       | L4  | <i>lag-2::GFP</i> | 2.0±0.0 (n=39)   | 2.0±0.0 (n=35)        |

\*one side of GFP expressing V cells were counted per animal

**Table S4 Comparison of wild type and *ubc-25(ok1732)* E lineage cell cycle lengths**

| cell | average cell division length* |                                        |
|------|-------------------------------|----------------------------------------|
|      | wild type<br>n=2              | <i>ubc-25(ok1732)</i> (% of wt)<br>n=5 |
| E    | 36.5±0.7                      | 32.4±2.4 (89)                          |
| Ea   | 41.0±1.4                      | 35.4±4.4 (86)                          |
| Ear  | 67.0±9.9                      | 47.2±2.9 (70)                          |
| Eara | 125±21.2                      | 56.6±6.3 (45)                          |

\*time (minutes) from mitosis producing named cell to division of cell

**Table S5 Several *ubc* genes act redundant to *ubc-25*.**

| RNAi target*  | intestinal nuclei, avg $\pm$ std dev |                       |
|---------------|--------------------------------------|-----------------------|
|               | wild type                            | <i>ubc-25(ok1732)</i> |
| <i>unc-73</i> | 33.1 $\pm$ 1.4                       | 38.3 $\pm$ 6.5        |
| <i>cdc-14</i> | 35.3 $\pm$ 2.8                       | 48.5 $\pm$ 10.2       |
| <i>ubc-1</i>  | 33.0 $\pm$ 2.6                       | 54.5 $\pm$ 9.2        |
| <i>ubc-2</i>  | Let                                  | Let                   |
| <i>ubc-3</i>  | 31.9 $\pm$ 1.3                       | 38.9 $\pm$ 5.7        |
| <i>ubc-6</i>  | 32.6 $\pm$ 1.2                       | 44.5 $\pm$ 11.3       |
| <i>ubc-7</i>  | 32.5 $\pm$ 1.1                       | 36.3 $\pm$ 7.9        |
| <i>ubc-8</i>  | N/A                                  | N/A                   |
| <i>ubc-9</i>  | 34.5 $\pm$ 3.4                       | Let                   |
| <i>ubc-12</i> | 31.7 $\pm$ 1.8                       | Let                   |
| <i>ubc-13</i> | N/A                                  | N/A                   |
| <i>ubc-14</i> | N/A                                  | N/A                   |
| <i>ubc-15</i> | 32.5 $\pm$ 1.1                       | 38.8 $\pm$ 5.0        |
| <i>ubc-16</i> | 32 $\pm$ 2.0                         | 40.6 $\pm$ 8.3        |
| <i>ubc-17</i> | 32.9 $\pm$ 1.6                       | 50.4 $\pm$ 12.2       |
| <i>ubc-18</i> | 33.2 $\pm$ 2.6                       | 38.2 $\pm$ 5.6        |
| <i>ubc-19</i> | N/A                                  | N/A                   |
| <i>ubc-20</i> | 33.3 $\pm$ 2.4                       | 53.9 $\pm$ 9.3        |
| <i>ubc-21</i> | 31.7 $\pm$ 0.9                       | 47.8 $\pm$ 13.8       |
| <i>ubc-22</i> | 32.6 $\pm$ 2.1                       | 42.7 $\pm$ 8.9        |
| <i>ubc-23</i> | 32.9 $\pm$ 1.1                       | 45.6 $\pm$ 7.6        |
| <i>ubc-24</i> | 32.6 $\pm$ 2.0                       | 39.1 $\pm$ 7.7        |
| <i>ubc-25</i> | 32.3 $\pm$ 2.0                       | 44.2 $\pm$ 10.3       |
| <i>ubc-26</i> | N/A                                  | N/A                   |

\*no *ubcs* numbered 4, 5, 10 and 11 in *C. elegans*

N/A=not available in RNAi Library

*unc-73* and *cdc-14* are negative and positive controls, respectively.

n $\geq$ 15 for all experiments.



**Table S6 Examination of putative *elm* genes for enhancement of extra intestinal nuclei phenotypes**

Available for download at <http://www.g3journal.org/lookup/suppl/doi:10.1534/g3.114.010546/-/DC1>.
