# Supplementary material for: A Complex Regulatory Network Coordinating Cell Cycles During C. elegans Development Is Revealed by a Genome-Wide RNAi Screen
Source: PubMed Central journal article supplement (PMC4025478; doi:10.1534/g3.114.010546), 2014-02-28
Supplement: supp_g3.114.010546_TableS2.pdf [file supp_g3.114.010546_TableS2.pdf]

**Table S2** *ubc-25(ok1732)* causes temperature-sensitive viability defect

| Temp. | wild type         |              | <i>ubc-25(ok1732)</i> |              |
|-------|-------------------|--------------|-----------------------|--------------|
|       | Brood size        | % Emb        | Brood size            | % Emb        |
| 15°C  | 189.4±19.7 (n=8)  | 0.8 (n=1510) | 181.9±34.5 (n=11)     | 2.6 (n=2001) |
| 20°C  | 273.0±34.6 (n=10) | 2.7 (n=2734) | 236.4±53.8 (n=11)     | 6.7 (n=2600) |
| 25°C  | 190.6±32.5 (n=7)  | 1.6 (n=1576) | 64.9±15.5 (n=9)       | 69.8 (n=584) |
