# Supplementary material for: A Complex Regulatory Network Coordinating Cell Cycles During C. elegans Development Is Revealed by a Genome-Wide RNAi Screen
Source: PubMed Central journal article supplement (PMC4025478; doi:10.1534/g3.114.010546), 2014-02-28
Supplement: supp_g3.114.010546_TableS3.pdf [file supp_g3.114.010546_TableS3.pdf]

**Table S3** The *ubc-25(ok1732)* mutation does not disturb the cell-cycle quiescence of the M, V, and Z cell lineages

| lineage | age | reporter          | wild type        | <i>ubc-25(ok1732)</i> |
|---------|-----|-------------------|------------------|-----------------------|
| M       | L2  | <i>hlh-8::GFP</i> | 16.5±0.7 (n=24)  | 17.7±0.6 (n=20)       |
| V       | L4  | <i>scm::GFP</i>   | 16.1±0.2 (n=20)* | 16.1±0.6 (n=20)*      |
| Z       | L4  | <i>lag-2::GFP</i> | 2.0±0.0 (n=39)   | 2.0±0.0 (n=35)        |

\*one side of GFP expressing V cells were counted per animal
