# Supplementary material for: A Complex Regulatory Network Coordinating Cell Cycles During C. elegans Development Is Revealed by a Genome-Wide RNAi Screen
Source: PubMed Central journal article supplement (PMC4025478; doi:10.1534/g3.114.010546), 2014-02-28
Supplement: supp_g3.114.010546_TableS4.pdf [file supp_g3.114.010546_TableS4.pdf]

**Table S4 Comparison of wild type and *ubc-25(ok1732)* E lineage cell cycle lengths**

| cell | average cell division length* |                                        |
|------|-------------------------------|----------------------------------------|
|      | wild type<br>n=2              | <i>ubc-25(ok1732)</i> (% of wt)<br>n=5 |
| E    | 36.5±0.7                      | 32.4±2.4 (89)                          |
| Ea   | 41.0±1.4                      | 35.4±4.4 (86)                          |
| Ear  | 67.0±9.9                      | 47.2±2.9 (70)                          |
| Eara | 125±21.2                      | 56.6±6.3 (45)                          |

\*time (minutes) from mitosis producing named cell to division of cell
