# Supplementary material for: A Complex Regulatory Network Coordinating Cell Cycles During C. elegans Development Is Revealed by a Genome-Wide RNAi Screen
Source: PubMed Central journal article supplement (PMC4025478; doi:10.1534/g3.114.010546), 2014-02-28
Supplement: supp_g3.114.010546_TableS5.pdf [file supp_g3.114.010546_TableS5.pdf]

**Table S5 Several *ubc* genes act redundant to *ubc-25*.**

| RNAi target*  | intestinal nuclei, avg $\pm$ std dev |                       |
|---------------|--------------------------------------|-----------------------|
|               | wild type                            | <i>ubc-25(ok1732)</i> |
| <i>unc-73</i> | 33.1 $\pm$ 1.4                       | 38.3 $\pm$ 6.5        |
| <i>cdc-14</i> | 35.3 $\pm$ 2.8                       | 48.5 $\pm$ 10.2       |
| <i>ubc-1</i>  | 33.0 $\pm$ 2.6                       | 54.5 $\pm$ 9.2        |
| <i>ubc-2</i>  | Let                                  | Let                   |
| <i>ubc-3</i>  | 31.9 $\pm$ 1.3                       | 38.9 $\pm$ 5.7        |
| <i>ubc-6</i>  | 32.6 $\pm$ 1.2                       | 44.5 $\pm$ 11.3       |
| <i>ubc-7</i>  | 32.5 $\pm$ 1.1                       | 36.3 $\pm$ 7.9        |
| <i>ubc-8</i>  | N/A                                  | N/A                   |
| <i>ubc-9</i>  | 34.5 $\pm$ 3.4                       | Let                   |
| <i>ubc-12</i> | 31.7 $\pm$ 1.8                       | Let                   |
| <i>ubc-13</i> | N/A                                  | N/A                   |
| <i>ubc-14</i> | N/A                                  | N/A                   |
| <i>ubc-15</i> | 32.5 $\pm$ 1.1                       | 38.8 $\pm$ 5.0        |
| <i>ubc-16</i> | 32 $\pm$ 2.0                         | 40.6 $\pm$ 8.3        |
| <i>ubc-17</i> | 32.9 $\pm$ 1.6                       | 50.4 $\pm$ 12.2       |
| <i>ubc-18</i> | 33.2 $\pm$ 2.6                       | 38.2 $\pm$ 5.6        |
| <i>ubc-19</i> | N/A                                  | N/A                   |
| <i>ubc-20</i> | 33.3 $\pm$ 2.4                       | 53.9 $\pm$ 9.3        |
| <i>ubc-21</i> | 31.7 $\pm$ 0.9                       | 47.8 $\pm$ 13.8       |
| <i>ubc-22</i> | 32.6 $\pm$ 2.1                       | 42.7 $\pm$ 8.9        |
| <i>ubc-23</i> | 32.9 $\pm$ 1.1                       | 45.6 $\pm$ 7.6        |
| <i>ubc-24</i> | 32.6 $\pm$ 2.0                       | 39.1 $\pm$ 7.7        |
| <i>ubc-25</i> | 32.3 $\pm$ 2.0                       | 44.2 $\pm$ 10.3       |
| <i>ubc-26</i> | N/A                                  | N/A                   |

\*no *ubcs* numbered 4, 5, 10 and 11 in *C. elegans*

N/A=not available in RNAi Library

*unc-73* and *cdc-14* are negative and positive controls, respectively.

n $\geq$ 15 for all experiments.
